# Supplementary material
Source: PubMed Central journal article supplement (PMC4854561)
Supplement: f-72-00346-sup1.pdf [file f-72-00346-sup1.pdf]

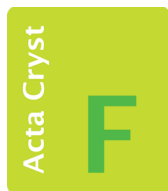

STRUCTURAL BIOLOGY  
COMMUNICATIONS

**Volume 72 (2016)**

**Supporting information for article:**

**Structures of endothiapsin-fragment complexes by  
crystallographic fragment-screening using a novel, diverse and  
affordable 96-compound-fragment library**

**Franziska U. Huschmann, Janina Linnik, Karine Sparta, Monika Ühlein, Xiaojie Wang, Alexander Metz, Johannes Schiebel, Andreas Heine, Gerhard Klebe, Manfred S. Weiss and Uwe Mueller**

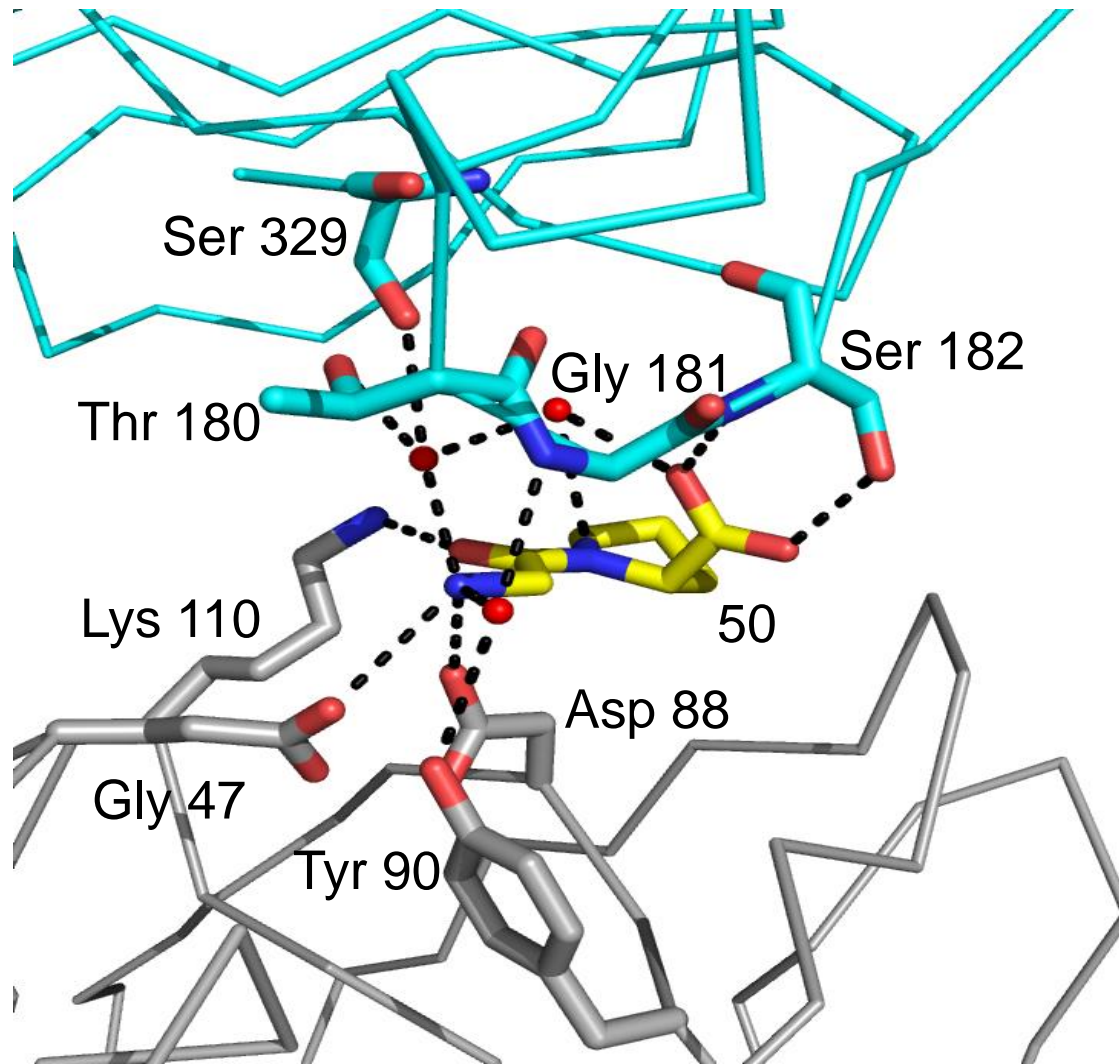

**Figure S1:** A more detailed representation of the binding of compound 50 (GlyPro) to the interface between two symmetry-related EP molecules. Shown are the C $\alpha$ -traces of the 2 EP molecules (in grey and cyan), as well as all main chain or side chain atoms of the amino acid residues participating in a contact to GlyPro. Water molecules, which take part in a contact are also shown (red spheres).

**Table S1:** 96-compound fragment library - detailed information.

| Fragment ID | Molecule                                                                            | CAS #      | Name                                                                  | MW [Da] <sup>[a]</sup> | tPSA [Å <sup>2</sup> ] <sup>[a]</sup> | logP(o/w) <sup>[a]</sup> | Solubility <sup>[b]</sup> | LD50 [mg/kg] |
|-------------|-------------------------------------------------------------------------------------|------------|-----------------------------------------------------------------------|------------------------|---------------------------------------|--------------------------|---------------------------|--------------|
| 1           | 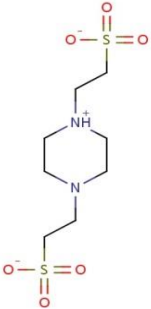   | 5625-37-6  | PIPES /<br>piperazine-N,N'-bis(ethanesulfonic acid)                   | 301,36                 | 110,10                                | -2,69                    | 3.3 mM<br>at 100°C        |              |
| 2           |    | 75277-39-3 | HEPES /<br>sodium-N-(2-hydroxyethyl) piperazin-N'-(2-ethanesulfonate) | 238,31                 | 79,12                                 | -2,19                    | 1.9 M                     |              |
| 3           |  | 4432-31-9  | MES /<br>2-(N-morpholino) ethanesulfonic acid                         | 194,23                 | 63,68                                 | -1,46                    | 1.3 M                     |              |

| Fragment ID | Molecule                                                                           | CAS #      | Name                                              | MW [Da] <sup>[a]</sup> | tPSA [Å <sup>2</sup> ] <sup>[a]</sup> | logP(o/w) <sup>[a]</sup> | Solubility <sup>[b]</sup> | LD50 [mg/kg] |
|-------------|------------------------------------------------------------------------------------|------------|---------------------------------------------------|------------------------|---------------------------------------|--------------------------|---------------------------|--------------|
| 4           | 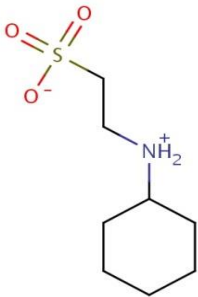  | 103-47-9   | CHES /<br>N-Cyclohexyl-2-aminoethanesulfonic acid | 207,29                 | 67,82                                 | 0,69                     | 851.3 mM                  |              |
| 5           |   | 26239-55-4 | ADA /<br>N-(2-acetamido)iminodiacetic acid        | 190,15                 | 120,93                                | -2,05                    | 841.2 mM<br>in 1MNaOH     |              |
| 6           |  | 68-04-2    | Citric acid trisodium salt dihydrate              | 192,12                 | 132.13                                | -1,53                    | 2.6 M                     |              |

| Fragment ID | Molecule                                                                           | CAS #      | Name                                                                     | MW [Da] <sup>[a]</sup> | tPSA [Å <sup>2</sup> ] <sup>[a]</sup> | logP(o/w) <sub>a</sub> <sup>[</sup> | Solubility <sup>[b]</sup> | LD50 [mg/kg] |
|-------------|------------------------------------------------------------------------------------|------------|--------------------------------------------------------------------------|------------------------|---------------------------------------|-------------------------------------|---------------------------|--------------|
| 7           | 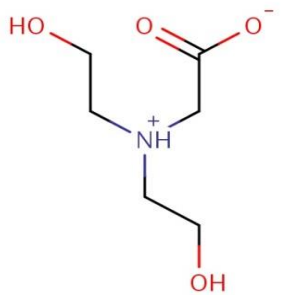  | 150-25-4   | Bicine /<br>N,N-bis(2-hydroxyethyl)glycine                               | 163,17                 | 85.03                                 | -1,60                               | 2.0 M                     |              |
| 8           |   | 64431-96-5 | Bis-Tris Propane /<br>1,3-bis[tris(hydroxymethyl)<br>methylamino]propane | 282,34                 | 127,86                                | -3,22                               | 1.5 M                     |              |
| 9           |  | 50-99-7    | D-(+)-Glucose                                                            | 180,16                 | 110,38                                | -2,93                               | 5.1 M                     |              |

| Fragment ID | Molecule                                                                           | CAS #       | Name                                              | MW [Da] <sup>[a]</sup> | tPSA [Å <sup>2</sup> ] <sup>[a]</sup> | logP(o/w) <sup>[a]</sup> | Solubility <sup>[b]</sup> | LD50 [mg/kg] |
|-------------|------------------------------------------------------------------------------------|-------------|---------------------------------------------------|------------------------|---------------------------------------|--------------------------|---------------------------|--------------|
| 10          | 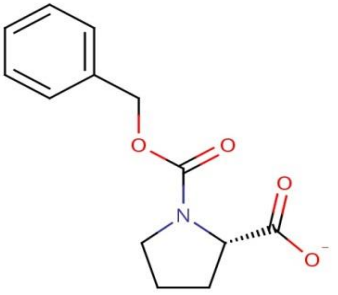  | 1148-11-4   | Z-Pro-OH /<br>1-[(Benzyloxy)carbonyl]-L-proline   | 248,26                 | 69,67                                 | 2,09                     | very soluble              |              |
| 11          |   | 102029-88-9 | N-Acetyl-D-glucosamine 6-phosphate<br>sodium salt | 301,19                 | 166                                   | -3,9                     | 144.8 mM                  |              |
| 12          |  | 3616-42-0   | D-Glucosamine 6-phosphate                         | 259,15                 | 162,70                                | -4,04                    | 192.9 mM                  |              |

| Fragment ID | Molecule                                                                           | CAS #     | Name                           | MW [Da] <sup>[a]</sup> | tPSA [Å <sup>2</sup> ] <sup>[a]</sup> | logP(o/w) <sup>[a]</sup> | Solubility <sup>[b]</sup> | LD50 [mg/kg] |
|-------------|------------------------------------------------------------------------------------|-----------|--------------------------------|------------------------|---------------------------------------|--------------------------|---------------------------|--------------|
| 13          | 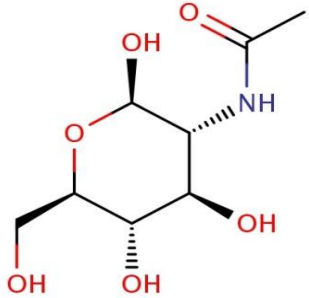  | 7512-17-6 | <i>N</i> -Acetyl-D-glucosamine | 221,21                 | 119,25                                | -2,99                    | 226.0 mM                  |              |
| 14          |   | 87-99-0   | D-Xylitol                      | 152,15                 | 101.15                                | -2,82                    | 328.5 mM                  |              |
| 15          |  | 6138-23-4 | D-(+)-Trehalose dihydrate      | 342,30                 | 189,53                                | -4,85                    | 132.2 mM                  |              |

| Fragment ID | Molecule                                                                           | CAS #      | Name                                                                                | MW [Da] <sup>[a]</sup> | tPSA [Å <sup>2</sup> ] <sup>[a]</sup> | logP(o/w) <sup>[a]</sup> | Solubility <sup>[b]</sup> | LD50 [mg/kg] |
|-------------|------------------------------------------------------------------------------------|------------|-------------------------------------------------------------------------------------|------------------------|---------------------------------------|--------------------------|---------------------------|--------------|
| 16          | 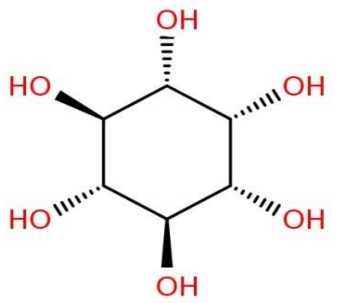  | 87-89-8    | myo-Inositol /<br>1,2,3,4,5,6-Hexahydroxycyclohexane                                | 180,16                 | 121,38                                | -3,50                    | 277.47 mM                 |              |
| 17          |   | 7414-56-4  | AMP-PCP disodium salt /<br>β,γ-Methyleneadenosine 5'-<br>triphosphate disodium salt | 505,21                 | 269,90                                | -5,40                    | 182.1 mM                  |              |
| 18          |  | 52558-16-4 | 2'-Deoxyguanosine 5'-monophosphate<br>sodium salt hydrate (dGMP)                    | 347,22                 | 181,52                                | -2,09                    | 144.0 mM                  |              |



| Fragment ID | Molecule                                                                           | CAS #      | Name                                           | MW [Da] <sup>[a]</sup> | tPSA [Å <sup>2</sup> ] <sup>[a]</sup> | logP(o/w) <sup>[a]</sup> | Solubility <sup>[b]</sup>       | LD50 [mg/kg] |
|-------------|------------------------------------------------------------------------------------|------------|------------------------------------------------|------------------------|---------------------------------------|--------------------------|---------------------------------|--------------|
| 19          | 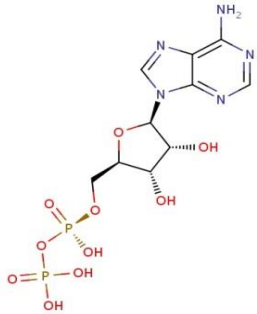  | 20398-34-9 | Adenosine 5'-diphosphate sodium salt (ADP)     | 427,20                 | 232,60                                | -4,09                    | 117.0 mM                        |              |
| 20          |   | 4578-31-8  | Adenosine 5'-monophosphate disodium salt (AMP) | 347,22                 | 186,07                                | -3,21                    | no Info                         |              |
| 21          |  | 1032-65-1  | 2'-Deoxycytidine 5'-monophosphate (dCMP)       | 305,18                 | 148,59                                | -2,50                    | 162.8 in 1 M NH <sub>4</sub> OH |              |

| Fragment ID | Molecule                                                                           | CAS #   | Name                                                           | MW [Da] <sup>[a]</sup> | tPSA [Å <sup>2</sup> ] <sup>[a]</sup> | logP(o/w) <sup>[a]</sup> | Solubility <sup>[b]</sup> | LD50 [mg/kg]    |
|-------------|------------------------------------------------------------------------------------|---------|----------------------------------------------------------------|------------------------|---------------------------------------|--------------------------|---------------------------|-----------------|
| 22          | 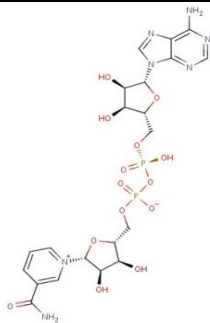  | 53-84-9 | β-Nicotinamide adenine dinucleotide hydrate (β-NAD)            | 665,45                 | 317,62                                | -6,01                    | 75.4 mM                   |                 |
| 24          |   | 53-59-8 | β-Nicotinamide adenine dinucleotide phosphate hydrate (β-NADP) | 746,43                 | 365,35                                | -6,71                    | 67.3 mM                   |                 |
| 25          |  | 98-92-0 | Nicotinamide /<br>Pyridine-3-carboxylic acid amide             | 122,13                 | 55,98                                 | -0,38                    | 819.0 mM                  | 3500 (rat oral) |

| Fragment ID | Molecule                                                                           | CAS #     | Name                                                               | MW [Da] <sup>[a]</sup> | tPSA [Å <sup>2</sup> ] <sup>[a]</sup> | logP(o/w) <sub>a</sub> <sup>[</sup> | Solubility <sup>[b]</sup> | LD50 [mg/kg] |
|-------------|------------------------------------------------------------------------------------|-----------|--------------------------------------------------------------------|------------------------|---------------------------------------|-------------------------------------|---------------------------|--------------|
| 26          | 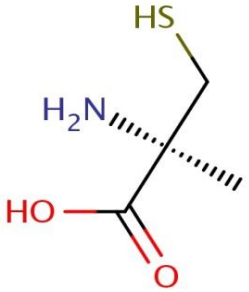  | 1187-84-4 | 2-methyl-L-cysteine / (R)-2-Amino-3-(methylmercapto)propionic acid | 135,19                 | 102,12                                | -2,54                               | 369 mM                    |              |
| 28          |   | 6230-11-1 | O-methyl-L-tyrosine                                                | 195,22                 | 72,55                                 | -1,57                               | NA                        |              |
| 29          |  | 7524-50-7 | L-Phenylalanine methyl ester hydrochloride                         | 179,22                 | 52,32                                 | 1,14                                | NA                        |              |

| Fragment ID | Molecule                                                                           | CAS #       | Name                      | MW [Da] <sup>[a]</sup> | tPSA [Å <sup>2</sup> ] <sup>[a]</sup> | logP(o/w) <sup>[a]</sup> | Solubility <sup>[b]</sup>                    | LD50 [mg/kg] |
|-------------|------------------------------------------------------------------------------------|-------------|---------------------------|------------------------|---------------------------------------|--------------------------|----------------------------------------------|--------------|
| 30          | 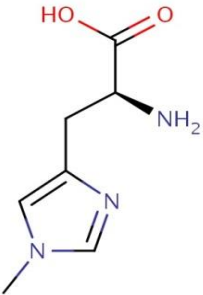  | 332-80-9    | 1-Methyl-L-histidine      | 169,18                 | 81,14                                 | -3,44                    | NA                                           |              |
| 31          |   | 51-35-4     | trans-4-Hydroxy-L-proline | 131,13                 | 69,56                                 | -0,96                    | 381.4 mM                                     |              |
| 32          |  | 110117-83-4 | 1-Methyl-D-tryptophan     | 218,26                 | 68,25                                 | -0,77                    | soluble in water (slightly), and acitic acid |              |

| Fragment ID | Molecule                                                                           | CAS #   | Name                | MW [Da] <sup>[a]</sup> | tPSA [Å <sup>2</sup> ] <sup>[a]</sup> | logP(o/w) <sup>[a]</sup> | Solubility <sup>[b]</sup> | LD50 [mg/kg] |
|-------------|------------------------------------------------------------------------------------|---------|---------------------|------------------------|---------------------------------------|--------------------------|---------------------------|--------------|
| 33          | 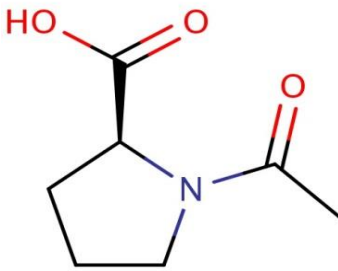  | 68-95-1 | N-Acetyl-L-proline  | 157,17                 | 57,61                                 | -0,10                    | NA                        |              |
| 34          |   | 98-79-3 | L-Pyroglutamic acid | 129,11                 | 66,40                                 | -0,78                    | 774.6 mM – 1.2 M          |              |
| 35          |  | 74-79-3 | D-Arginine          | 175,21                 | 126,96                                | -3,41                    | 287.0 mM                  |              |

| Fragment ID | Molecule                                                                            | CAS #      | Name                                                 | MW [Da] <sup>[a]</sup> | tPSA [Å <sup>2</sup> ] <sup>[a]</sup> | logP(o/w) <sup>[a]</sup> | Solubility <sup>[b]</sup> | LD50 [mg/kg] |
|-------------|-------------------------------------------------------------------------------------|------------|------------------------------------------------------|------------------------|---------------------------------------|--------------------------|---------------------------|--------------|
| 36          | 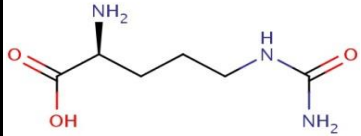   | 372-75-8   | L-Citrulline /<br>(S)-2-Amino-5-ureidopentanoic acid | 175,19                 | 118,44                                | -3,97                    | 1.1 M                     |              |
| 37          |    | 22059-21-8 | 1-Aminocyclopropane-carboxylic acid                  | 101,10                 | 63,32                                 | -2,80                    | 484.7 –<br>504.5 mM       |              |
| 39          |  | 929-17-9   | 7-Aminoptanoic acid                                  | 145,20                 | 63,32                                 | 0,74                     | NA                        |              |

| Fragment ID | Molecule                                                                            | CAS #     | Name                                                  | MW [Da] <sup>[a]</sup> | tPSA [Å <sup>2</sup> ] <sup>[a]</sup> | logP(o/w) <sup>[a]</sup> | Solubility <sup>[b]</sup> | LD50 [mg/kg] |
|-------------|-------------------------------------------------------------------------------------|-----------|-------------------------------------------------------|------------------------|---------------------------------------|--------------------------|---------------------------|--------------|
| 40          | 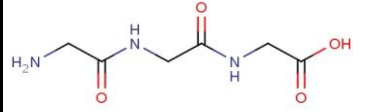   | 556-33-2  | Glycyl-glycyl-glycine                                 | 143,19                 | 49,33                                 | 0,94                     | 0.5 M                     |              |
| 41          |    | 616-91-1  | N-acetyl-L-cysteine                                   | 163,20                 | 105,20                                | -0,38                    | 612.8 mM                  |              |
| 42          |  | 7533-40-6 | (S)-(+)-Leucinol /<br>(S)-2-Amino-4-methyl-1-pentanol | 117,19                 | 46,25                                 | 0,56                     | NA                        |              |

| Fragment ID | Molecule                                                                           | CAS #       | Name                                              | MW [Da] <sup>[a]</sup> | tPSA [Å <sup>2</sup> ] <sup>[a]</sup> | logP(o/w) <sup>[a]</sup> | Solubility <sup>[b]</sup> | LD50 [mg/kg]    |
|-------------|------------------------------------------------------------------------------------|-------------|---------------------------------------------------|------------------------|---------------------------------------|--------------------------|---------------------------|-----------------|
| 43          | 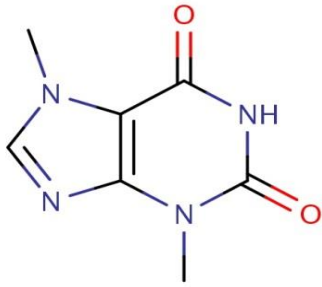  | 83-67-0     | Theobromine /<br>2,6-Dihydroxy-3,7-dimethylpurine | 180,17                 | 67,23                                 | -0,80                    | < 5.6 mM                  | 1265 (rat oral) |
| 44          |   | 210545-23-6 | N-alpha-Acetyl-L-arginine dihydrate               | 216,24                 | 130,80                                | -0,97                    | NA                        |                 |
| 45          |  | 65-82-7     | N-Acetyl-L-methionine                             | 191,25                 | 66,40                                 | 0,17                     | NA                        |                 |



| Fragment ID | Molecule                                                                           | CAS #     | Name                                             | MW [Da] <sup>[a]</sup> | tPSA [Å <sup>2</sup> ] <sup>[a]</sup> | logP(o/w) <sup>[a]</sup> | Solubility <sup>[b]</sup> | LD50 [mg/kg] |
|-------------|------------------------------------------------------------------------------------|-----------|--------------------------------------------------|------------------------|---------------------------------------|--------------------------|---------------------------|--------------|
| 46          | 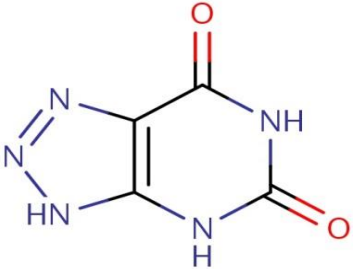  | 1468-26-4 | 8-Azaxanthine monohydrate                        | 153,10                 | 99,77                                 | -1,18                    | NA                        |              |
| 47          |   | 115-02-6  | Azaserine /<br>O-Diazoacetyl-L-serine            | 173,13                 | 101,98                                | -4,18                    | 288.9 mM                  |              |
| 48          |  | 107-41-5  | Hexylene glycol /<br>(±)-2-Methyl-2,4-pentandiol | 118,18                 | 40,46                                 | 0,68                     | 1 M                       |              |

| Fragment ID | Molecule                                                                           | CAS #    | Name                               | MW [Da] <sup>[a]</sup> | tPSA [Å <sup>2</sup> ] <sup>[a]</sup> | logP(o/w) <sup>[a]</sup> | Solubility <sup>[b]</sup> | LD50 [mg/kg]                       |
|-------------|------------------------------------------------------------------------------------|----------|------------------------------------|------------------------|---------------------------------------|--------------------------|---------------------------|------------------------------------|
| 49          | 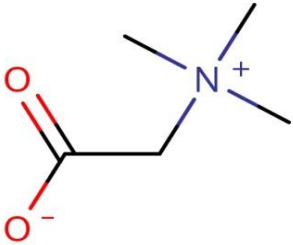  | 107-43-7 | Betaine                            | 117,15                 | 40,13                                 | -0,53                    | 13.7 M                    | 11179 (rat oral), 830 (mouse i.v.) |
| 50          |   | 704-15-4 | Gly-Pro / Glycylproline            | 172,18                 | 83,63                                 | -1,14                    | 290.4 mM                  |                                    |
| 51          |  | 58-08-2  | Caffeine / 1,3,7-Trimethylxanthine | 194,19                 | 58,44                                 | -0,60                    | 82.4 mM                   | 367.7 (rat oral)                   |

| Fragment ID | Molecule                                                                           | CAS #     | Name                                                    | MW [Da] <sup>[a]</sup> | tPSA [Å <sup>2</sup> ] <sup>[a]</sup> | logP(o/w) <sup>[a]</sup> | Solubility <sup>[b]</sup> | LD50 [mg/kg] |
|-------------|------------------------------------------------------------------------------------|-----------|---------------------------------------------------------|------------------------|---------------------------------------|--------------------------|---------------------------|--------------|
| 52          | 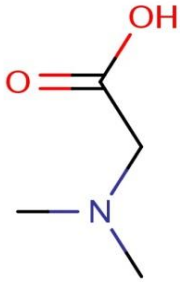  | 1118-68-9 | N,N-Dimethylglycine                                     | 103,12                 | 40,54                                 | -0,33                    | 485.0 mM                  |              |
| 53          |   | 543-38-4  | L-Canavanine / L-α-Amino-γ-(guanidinoxy)-n-butyric acid | 176,18                 | 134,45                                | -3,61                    | 567.5 mM                  |              |
| 55          |  | 73-40-5   | Guanine / 2-Amino-1,7-dihydro-6H-purin-6-one            | 151,13                 | 96,16                                 | -1,32                    | 165.5 mM in 5 M HCl       |              |

| Fragment ID | Molecule                                                                           | CAS #      | Name                                                                                     | MW [Da] <sup>[a]</sup> | tPSA [Å <sup>2</sup> ] <sup>[a]</sup> | logP(o/w) <sup>[a]</sup> | Solubility <sup>[b]</sup>                        | LD50 [mg/kg]       |
|-------------|------------------------------------------------------------------------------------|------------|------------------------------------------------------------------------------------------|------------------------|---------------------------------------|--------------------------|--------------------------------------------------|--------------------|
| 56          | 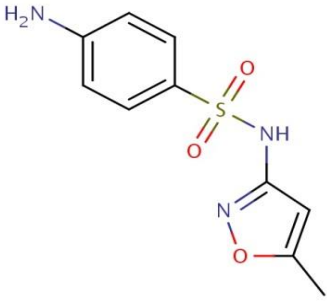  | 723-46-6   | Sulfamethoxazole /<br>4-Amino-N-(5-methyl-3-isoxazolyl)<br>benzenesulfonamide            | 253,28                 | 98,22                                 | 0,93                     | < 4.0 mM                                         |                    |
| 57          |   | 28860-95-9 | S-(-)-Carbidopa /<br>(S)-3-(3,4-Dihydroxy-phenyl)-2-<br>hydrazino-2-methylpropanoic acid | 226,23                 | 115,81                                | 0,35                     | 21.7 – 22.6<br>mM<br>in methanol<br>+ 1 drop HCl |                    |
| 58          |  | 541-15-1   | L-Carnitine / Vitamin BT;<br>(-)-(R)-3-Hydroxy-4-<br>(trimethylammonio)<br>butyrate      | 162,21                 | 57,53                                 | -1,13                    | 310.2 mM                                         | 6890 (rat<br>oral) |

| Fragment ID | Molecule                                                                           | CAS #     | Name                                              | MW [Da] <sup>[a]</sup> | tPSA [Å <sup>2</sup> ] <sup>[a]</sup> | logP(o/w) <sup>[a]</sup> | Solubility <sup>[b]</sup> | LD50 [mg/kg] |
|-------------|------------------------------------------------------------------------------------|-----------|---------------------------------------------------|------------------------|---------------------------------------|--------------------------|---------------------------|--------------|
| 59          | 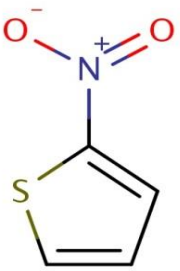  | 609-40-5  | 2-Nitrothiophene                                  | 129,14                 | 45,82                                 | 1,70                     | NA                        |              |
| 60          |   | 62-23-7   | 4-Nitrobenzoic acid                               | 167,12                 | 83,12                                 | 1,52                     | < 59.8 mM                 |              |
| 61          |  | 3316-09-4 | 4-Nitrocatechol /<br>1,2-Dihydroxy-4-nitrobenzene | 155,11                 | 86,28                                 | 1,26                     | NA                        |              |

| Fragment ID | Molecule                                                                           | CAS #       | Name                                           | MW [Da] <sup>[a]</sup> | tPSA [Å <sup>2</sup> ] <sup>[a]</sup> | logP(o/w) <sub>a</sub> <sup>[</sup> | Solubility <sup>[b]</sup>       | LD50 [mg/kg] |
|-------------|------------------------------------------------------------------------------------|-------------|------------------------------------------------|------------------------|---------------------------------------|-------------------------------------|---------------------------------|--------------|
| 62          | 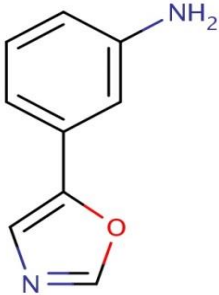  | 157837-31-5 | 3-(1,3-Oxazol-5-yl)aniline                     | 160,18                 | 52,05                                 | 0,75                                | NA                              |              |
| 63          |   | 1953-54-4   | 5-Hydroxyindole                                | 133,15                 | 36,02                                 | 2,00                                | NA                              |              |
| 64          |  | 20535-83-5  | 6-O-Methylguanine /<br>2-Amino-6-methoxypurine | 165,16                 | 89,71                                 | -0,43                               | soluble in<br>DMSO<br>and water |              |

| Fragment ID | Molecule                                                                           | CAS #     | Name                                                                                        | MW [Da] <sup>[a]</sup> | tPSA [Å <sup>2</sup> ] <sup>[a]</sup> | logP(o/w) <sup>[a]</sup> | Solubility <sup>[b]</sup>                        | LD50 [mg/kg] |
|-------------|------------------------------------------------------------------------------------|-----------|---------------------------------------------------------------------------------------------|------------------------|---------------------------------------|--------------------------|--------------------------------------------------|--------------|
| 65          | 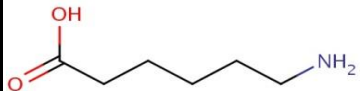  | 60-32-2   | 6-Aminocaproic acid                                                                         | 131,17                 | 63,32                                 | 0,29                     | 381.1 mM                                         |              |
| 66          |   | 51-43-4   | (-)-Epinephrine /<br>(R)-(-)-3,4-Dihydroxy- $\alpha$ -<br>(methylaminomethyl)benzyl alcohol | 183,21                 | 72,72                                 | 0,53                     | < 545.9 $\mu$ M<br>/<br>272.9 mM<br>in 0.5 M HCl |              |
| 67          |  | 3544-24-9 | 3-Aminobenzamide                                                                            | 136,15                 | 69,11                                 | 0,21                     | 183.6 mM /<br>367.1 mM<br>in EtOH                |              |

| Fragment ID | Molecule                                                                           | CAS #      | Name                                                                                  | MW [Da] <sup>[a]</sup> | tPSA [Å <sup>2</sup> ] <sup>[a]</sup> | logP(o/w) <sup>[a]</sup> | Solubility <sup>[b]</sup> | LD50 [mg/kg] |
|-------------|------------------------------------------------------------------------------------|------------|---------------------------------------------------------------------------------------|------------------------|---------------------------------------|--------------------------|---------------------------|--------------|
| 68          | 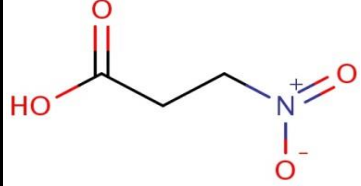  | 504-88-1   | 3-Nitropropionic acid                                                                 | 119,08                 | 83,12                                 | -0,22                    | 839.6 mM in alcohol       |              |
| 69          |   | 1197-18-8  | trans-4-(Aminomethyl)cyclohexanecarboxylic acid                                       | 157,21                 | 63,32                                 | 0,53                     | 318.1 mM                  |              |
| 70          |  | 22150-76-1 | 6-Biopterin / (1'R,2'S)-Biopterin, 2-Amino-4-hydroxy-6-(1,2-dihydroxypropyl)pteridine | 237,22                 | 134                                   | -2,0                     | 3.0 mM                    |              |



| Fragment ID | Molecule                                                                           | CAS #      | Name                                            | MW [Da] <sup>[a]</sup> | tPSA [Å <sup>2</sup> ] <sup>[a]</sup> | logP(o/w) <sup>[a]</sup> | Solubility <sup>[b]</sup>                | LD50 [mg/kg]      |
|-------------|------------------------------------------------------------------------------------|------------|-------------------------------------------------|------------------------|---------------------------------------|--------------------------|------------------------------------------|-------------------|
| 71          | 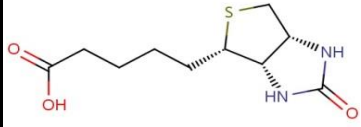  | 58-85-5    | Biotin /<br>Vitamin B7                          | 244,31                 | 78,43                                 | 0,32                     | 204.7 mM<br>in 2 M<br>NH <sub>4</sub> OH |                   |
| 72          |   | 30411-84-8 | 4-methylsulfanyl-2-ureido-butyrlic acid         | 192,24                 | 92,42                                 | -0,55                    | NA                                       |                   |
| 73          |  | 95-25-0    | Chlorzoxazone /<br>5-Chloro-2(3H)-benzoxazolone | 169,57                 | 38,33                                 | 1,80                     | 294.8 mM<br>in MeOH                      | 763 (rat<br>oral) |

| Fragment ID | Molecule                                                                           | CAS #      | Name                                                                             | MW [Da] <sup>[a]</sup> | tPSA [Å <sup>2</sup> ] <sup>[a]</sup> | logP(o/w) <sup>[a]</sup> | Solubility <sup>[b]</sup> | LD50 [mg/kg] |
|-------------|------------------------------------------------------------------------------------|------------|----------------------------------------------------------------------------------|------------------------|---------------------------------------|--------------------------|---------------------------|--------------|
| 74          | 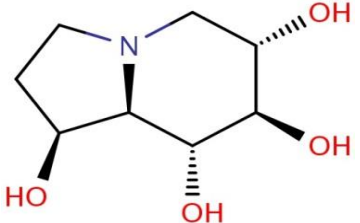  | 79831-76-8 | Castanospermine /<br>(1S,6S,7R,8R,8aR)-1,6,7,8-Tetrahydroxyoctahydroindolizidine | 189,21                 | 84                                    | -2,3                     | 105.7 mM<br>in 1 N HCL    |              |
| 75          |   | 660-88-8   | 5-Aminovaleric acid                                                              | 117,15                 | 63,32                                 | -0,15                    | NA                        |              |
| 76          |  | 7659-29-2  | 3,5-Dinitrocatechol /<br>3,5-Dinitro-1,2-benzenediol                             | 200,11                 | 132,10                                | 1,23                     | 5.0 mM                    |              |

| Fragment ID | Molecule                                                                           | CAS #      | Name                                                          | MW [Da] <sup>[a]</sup> | tPSA [Å <sup>2</sup> ] <sup>[a]</sup> | logP(o/w) <sub>a</sub> <sup>[</sup> | Solubility <sup>[b]</sup>                | LD50 [mg/kg] |
|-------------|------------------------------------------------------------------------------------|------------|---------------------------------------------------------------|------------------------|---------------------------------------|-------------------------------------|------------------------------------------|--------------|
| 77          | 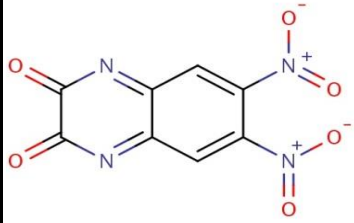  | 2379-57-9  | DNQX /<br>6,7-Dinitroquinoxaline-2,3(1H,4H)-<br>dione         | 250,13                 | 150,50                                | 0,32                                | 1.2 mM /<br>38.9 – 40.5<br>mM in<br>DMSO |              |
| 78          |   | 1596-84-5  | Daminozide /<br>Succinic acid mono(2,2-<br>dimethylhydrazide) | 160,17                 | 69,64                                 | -1,35                               | 624.2 mM                                 |              |
| 79          |  | 50901-18-3 | 3-(Acetylamino)thiophene-2-carboxylic<br>acid                 | 185,20                 | 66,40                                 | 0,74                                | NA                                       |              |

| Fragment ID | Molecule                                                                           | CAS #    | Name                                                        | MW [Da] <sup>[a]</sup> | tPSA [Å <sup>2</sup> ] <sup>[a]</sup> | logP(o/w) <sup>[a]</sup> | Solubility <sup>[b]</sup>                        | LD50 [mg/kg] |
|-------------|------------------------------------------------------------------------------------|----------|-------------------------------------------------------------|------------------------|---------------------------------------|--------------------------|--------------------------------------------------|--------------|
| 80          | 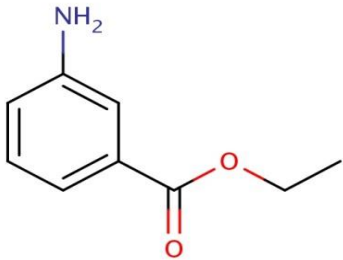  | 582-33-2 | Ethyl 3-aminobenzoate                                       | 165,19                 | 52,32                                 | 1,55                     | NA                                               |              |
| 82          |   | 496-46-8 | Glycoluril /<br>Tetrahydroimidazo[4,5-d]imidazole-2,5-dione | 142,12                 | 82,26                                 | -2,22                    | NA                                               |              |
| 83          |  | 118-00-3 | Guanosine /<br>9-(β-D-Ribofuranosyl)guanine                 | 283,24                 | 155,22                                | -2,89                    | 2.7 mM<br>/176.6 mM<br>in<br>acid:water<br>(1:1) |              |

| Fragment ID | Molecule                                                                           | CAS #     | Name                                           | MW [Da] <sup>[a]</sup> | tPSA [Å <sup>2</sup> ] <sup>[a]</sup> | logP(o/w) <sup>[a]</sup> | Solubility <sup>[b]</sup> | LD50 [mg/kg]       |
|-------------|------------------------------------------------------------------------------------|-----------|------------------------------------------------|------------------------|---------------------------------------|--------------------------|---------------------------|--------------------|
| 84          | 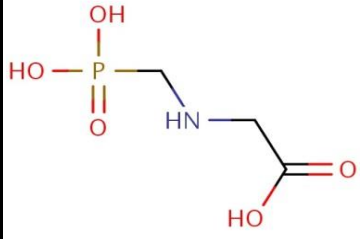  | 1071-83-6 | Glyphosate /<br>N-(phosphonomethyl)<br>glycine | 169,07                 | 106,86                                | -2,21                    | 71.0 mM                   | 5000 (rat<br>oral) |
| 85          |   | 619-57-8  | 4-Hydroxybenzamide                             | 137,14                 | 63,32                                 | 0,54                     | NA                        |                    |
| 86          |  | 4008-48-4 | 8-Hydroxy-5-nitroquinoline                     | 190,16                 | 78,94                                 | 1,73                     | NA                        |                    |

| Fragment ID | Molecule                                                                           | CAS #      | Name                                      | MW [Da] <sup>[a]</sup> | tPSA [Å <sup>2</sup> ] <sup>[a]</sup> | logP(o/w) <sub>a</sub> <sup>[</sup> | Solubility <sup>[b]</sup> | LD50 [mg/kg] |
|-------------|------------------------------------------------------------------------------------|------------|-------------------------------------------|------------------------|---------------------------------------|-------------------------------------|---------------------------|--------------|
| 87          | 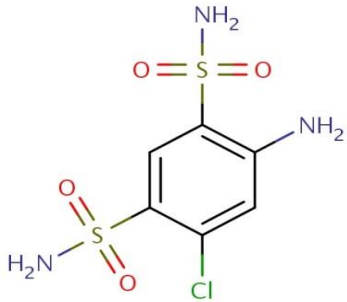  | 121-30-2   | 4-Amino-6-chloro-1,3-benzenedisulfonamide | 285,73                 | 146,34                                | -1,25                               | NA                        |              |
| 88          |   | 28822-58-4 | 3-Isobutyl-1-methylxanthine               | 222,25                 | 69,30                                 | 0,32                                | 225.0 mM in warm MeOH     |              |
| 89          |  | 7164-43-4  | 5-Aminoorotic acid                        | 171,11                 | 121,52                                | -1,64                               | NA                        |              |

| Fragment ID | Molecule                                                                           | CAS #       | Name                          | MW [Da] <sup>[a]</sup> | tPSA [Å <sup>2</sup> ] <sup>[a]</sup> | logP(o/w) <sub>a</sub> <sup>[</sup> | Solubility <sup>[b]</sup> | LD50 [mg/kg] |
|-------------|------------------------------------------------------------------------------------|-------------|-------------------------------|------------------------|---------------------------------------|-------------------------------------|---------------------------|--------------|
| 90          | 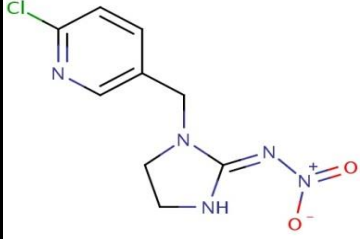  | 138261-41-3 | Imidacloprid                  | 255,66                 | 86,34                                 | 2,16                                | 2.4 mM                    |              |
| 91          |   | 13395-35-2  | 2-Iminobiotin                 | 243,33                 | 87,71                                 | 0,72                                | 205.5 mM<br>in 1 M HCl    |              |
| 92          |  | 25773-40-4  | 2-Isopropyl-3-methoxypyrazine | 152,20                 | 35,01                                 | 1,10                                | NA                        |              |

| Fragment ID | Molecule                                                                           | CAS #       | Name                                                                                                         | MW [Da] <sup>[a]</sup> | tPSA [Å <sup>2</sup> ] <sup>[a]</sup> | logP(o/w) <sub>a</sub> <sup>[</sup> | Solubility <sup>[b]</sup>                  | LD50 [mg/kg] |
|-------------|------------------------------------------------------------------------------------|-------------|--------------------------------------------------------------------------------------------------------------|------------------------|---------------------------------------|-------------------------------------|--------------------------------------------|--------------|
| 93          | 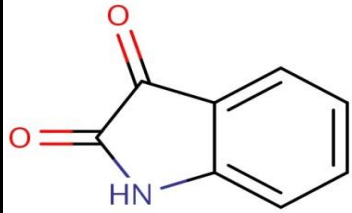  | 91-56-5     | Isatin /<br>2,3-Dioxo-2,3-dihydroindole                                                                      | 147,13                 | 46,17                                 | 0,44                                | 12.9 mM                                    |              |
| 94          |   | 696-07-1    | 5-Iodouracil /<br>2,4-Dihydroxy-5-iodopyrimidine                                                             | 237,98                 | 58,20                                 | 0,18                                | soluble in<br>cold Water<br>or 1 M<br>NaOH |              |
| 95          |  | 109944-15-2 | Kifunensine /<br>Hexahydro-6R,7S,8aS-trihydroxy-5R-<br>(hydroxy-methyl)-imidazo[1,2-a]<br>pyridine-2,3-dione | 232,19                 | 130                                   | -4,1                                | 4.3 mM                                     |              |



| Fragment ID | Molecule                                                                            | CAS #      | Name                                                                   | MW [Da] <sup>[a]</sup> | tPSA [Å <sup>2</sup> ] <sup>[a]</sup> | logP(o/w) <sup>[a]</sup> | Solubility <sup>[b]</sup> | LD50 [mg/kg]      |
|-------------|-------------------------------------------------------------------------------------|------------|------------------------------------------------------------------------|------------------------|---------------------------------------|--------------------------|---------------------------|-------------------|
| 96          | 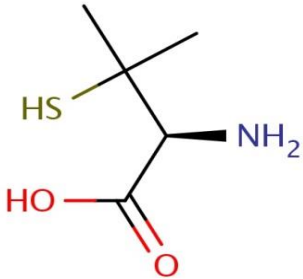   | 52-67-5    | D-Penicillamine /<br>3,3-Dimethyl-D-cysteine                           | 149,21                 | 102,12                                | -1,73                    | 744.0 mM                  | 6170 (rat oral)   |
| 97          |    | 51-41-2    | (-)-Norepinephrine /<br>(R)-4-(2-Amino-1-hydroxyethyl)-1,2-benzenediol | 169,18                 | 86,71                                 | 0,01                     | 295.5 mM                  |                   |
| 98          |  | 22839-47-0 | Aspartame /<br>N-(L-α-Aspartyl)-L-phenylalanine methyl ester           | 294,31                 | 118,72                                | -0,02                    | NA                        | >10000 (rat oral) |

| Fragment ID | Molecule                                                                           | CAS #   | Name                                                            | MW [Da] <sup>[a]</sup> | tPSA [Å <sup>2</sup> ] <sup>[a]</sup> | logP(o/w) <sub>a</sub> <sup>[</sup> | Solubility <sup>[b]</sup>   | LD50 [mg/kg]         |
|-------------|------------------------------------------------------------------------------------|---------|-----------------------------------------------------------------|------------------------|---------------------------------------|-------------------------------------|-----------------------------|----------------------|
| 99          | 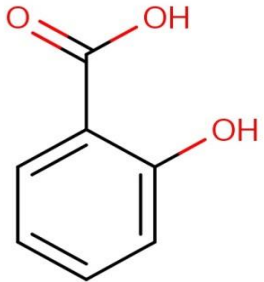  | 69-72-7 | Salicylic acid /<br>2-Hydroxybenzoic acid                       | 138,12                 | 57,53                                 | 1,27                                | 1M<br>in EtOH               |                      |
| 100         |   | 67-52-7 | Barbituric acid /<br>2,4,6-Trihydroxypyrimidine,<br>Malonylurea | 128,09                 | 75,27                                 | -1,38                               | 1.1 M                       | > 5000 (rat<br>oral) |
| 101         |  | 83-88-5 | (-)-Riboflavin /<br>Vitamin B2                                  | 376,37                 | 155,05                                | -1,21                               | 26.6 mM<br>in 0.1 M<br>NaOH |                      |

| Fragment ID | Molecule                                                                          | CAS #      | Name                                                                         | MW [Da] <sup>[a]</sup> | tPSA [Å <sup>2</sup> ] <sup>[a]</sup> | logP(o/w) <sub>a</sub> <sup>[a]</sup> | Solubility <sup>[b]</sup> | LD50 [mg/kg] |
|-------------|-----------------------------------------------------------------------------------|------------|------------------------------------------------------------------------------|------------------------|---------------------------------------|---------------------------------------|---------------------------|--------------|
| 102         | 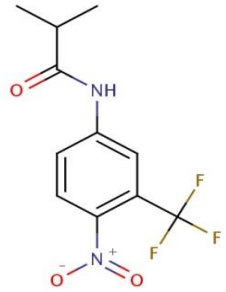 | 13311-84-7 | Flutamide /<br>2-Methyl-N-(4-nitro-3-<br>[trifluoromethyl]phenyl)propanamide | 276,21                 | 74,92                                 | 2,95                                  | 181.1 mM<br>in EtOH       |              |

[a] calculated by MOE (Chemical Computing Group Inc.)  
version 2014.09.

[b] in water at room temperature, if not stated otherwise

**Table S2.** Crystallographic fragment-screening campaigns reported in the literature.

| Fragment library                                                            | No. of fragments | Screening method                  | Target protein                          | Hit rate (no. of hits) | Availability of library/ individual compounds | Reference                         |
|-----------------------------------------------------------------------------|------------------|-----------------------------------|-----------------------------------------|------------------------|-----------------------------------------------|-----------------------------------|
| Self assembled                                                              | 800              | 80 cocktails of 10 fragments      | Soluble epoxide hydrolase               | 1% (8)                 | Not known                                     | Amano <i>et al.</i> (2015)        |
| Fragments of life (15% randomly selected)                                   | 200              | 25 cocktails of 8 fragments       | Leukotriene A4 hydrolase                | 6% (13)                | Yes                                           | Davies <i>et al.</i> (2009)       |
| Focused fragment library                                                    | 80               | -                                 | Thrombin                                | 2.5% (2)               | Not known                                     | Howard <i>et al.</i> (2006)       |
| Virtual library of ring scaffolds with side chains a)                       | 347              | Cocktails of 6 fragments          | $\beta$ -Secretase                      | 0.6% (2)               | Not known                                     | Murray <i>et al.</i> (2007)       |
| The fragment based screening library from ActiveSight (a Rigaku company) b) | 376              | 96 cocktails of 4 compounds       | Phenylethanol amine N-methyltransferase | 3.2% (12)              | Yes                                           | Drinkwater <i>et al.</i> (2010)   |
| ActiveSight fragment library 1                                              | 384              | 96 cocktails of 4 fragments       | Wild type HIV protease                  | ~0.8% (3)              | Possibly from ActiveSight                     | Perryman <i>et al.</i> (2010)     |
| Inhouse assembled c)                                                        | 775              | 143 cocktails of 4 to 8 fragments | HIV-1 reverse transcriptase             | 4.4% (34)              | Partly                                        | Bauman <i>et al.</i> (2012, 2013) |
| Small organic brominated molecules d)                                       | 18               | 6 cocktails of 3 fragments        | Elongation factor Tu                    | 5.6% (1)               | Not known                                     | Groftenhauge <i>et al.</i> (2013) |

|                                               |             |                                   |                                                       |            |           |                                  |
|-----------------------------------------------|-------------|-----------------------------------|-------------------------------------------------------|------------|-----------|----------------------------------|
| Compounds with at least one Br atom e)        | 68          | Individual soaking                | HIV-1 protease                                        | 3-6% (2-4) | Yes       | Tiefenbrunn <i>et al.</i> (2014) |
| Inhouse assembled c)                          | 775         | 143 cocktails of 4 to 8 fragments | Influenza endonuclease                                | 1% (8)     | Partly    | Bauman <i>et al.</i> (2013)      |
| Drug fragment set and focused phosphatase set | 327 and 264 | Cocktails of 2 to 8 fragments     | P38 MAP kinase, CDK2, thrombin, ribonuclease A, PTP1B | 0.5-10%    | Not known | Hartshorn <i>et al.</i> (2005)   |

- a) based on the small number of commonly appearing ring scaffolds and side chains in drugs
- b) 384 compounds in total, X-ray diffraction data were collected for 94 cocktails
- c) 500 compounds purchased from Maybridge (Cornwall, UK), 175 individual compounds purchased based on recommendations of Christophe Verlinde and Wim Hol (Verlinde *et al.*, 2009), 100 compounds gifted by James Williamson (The Scripps Research Institute, La Jolla, unpublished)
- d) A library for organic synthesis (Department of Chemistry, Aarhus University) e) selected by Maybridge Hit Finder

The program Marvin was used for drawing, displaying and characterizing chemical structures (Marvin 6.3.1, 2014, Chemaxon; <http://www.chemaxon.com>)
